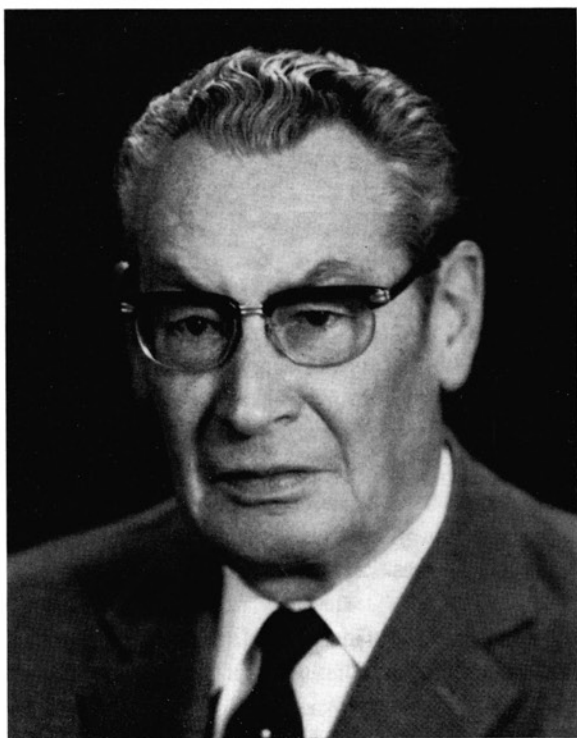

Professor Dr. Ferdinand May

## **Professor Dr. Ferdinand May 75 Jahre alt**

FERDINAND MAY feiert im Januar dieses Jahres seinen 75. Geburtstag. Schon vom Allgemeinen her scheint es angebracht, die Würde eines langen und reichen Menschenlebens festlich hervortreten zu lassen, damit es uns mahnt und unser eigenes Tun beeinflusst. Aber diesmal ist die Bedeutung gerade des Lebens, dem dieses Gedenken gilt, so gewichtig, dass es geradezu gebietet, Rückschau zu halten.

Sein eigentliches Wesen findet dieser Rückblick in dem hohen Arztum, dem der Jubilar lebte und aus dem heraus er formend und gestaltend die Entwicklung der Urologie nicht nur für Deutschland prägte. In der Mitte seines Denkens stand immer der kranke Mensch als freies Individuum, dem er seine Achtung zollte und für dessen Heilung er sich restlos einsetzte. Er tat dies immer mit grösster Gewissenhaftigkeit und Zuverlässigkeit und einem tiefgehenden intellektuellen Verständnis für den kranken Menschen in seiner Ganzheit. Dieses tiefe und bis ins kleinste gehende Pflichtbewusstsein war einer seiner markantesten Wesenszüge, beispielhaft nicht nur für uns, seine Schüler. Ein zweiter charakteristischer Wesenszug des Jubilars verdeutlicht sich in der Distanz, mit der er nicht nur modischen Richtungen seines Faches begegnete sondern in die er auch seine Umgebung mit einbezog und, wie mir scheinen will, sogar sich selbst. Aus dieser kritischen Distanz leitet sich wohl ein dritter charakteristischer Wesenszug FERDINAND MAYS ab, nämlich die strenge Unbestechlichkeit seines Denkens, so dass uns an ihm klar wurde, was Objektivität in der Wissenschaft bedeutet. Er hielt sich selbst, sein Tun und uns, seine Schüler, in strenger Zucht. Was Wunder, dass gerade ihm hohle Worte und leere Klugeheitsregeln zutiefst zuwider waren und ihn zwangen, Kritik zu üben. Strengstes Pflichtbewusstsein und kritische Überlegung waren somit Grundlage seiner schöpferischen Leistung und seiner wissenschaftlichen Bedeutung.

Sein Wissen umfasste das ganze Gebiet der Urologie oder besser, er vergegenwärtigte für uns die Urologie schlechthin. Die numerische Aufzählung seiner Publikationen erscheint deshalb hier wohl unerheblich, und es fällt schwer, bei der Fülle seines wissenschaftlichen Tuns bestimmte seiner Leistungen hervorzuheben. Es will mir aber scheinen, dass er Schwerpunkte setzte und richtungsweisend wurde vor allem auf dem Gebiet der urologischen Röntgenologie, der Behandlung der Urogenital-Tuberkulose, der Behandlung von Geschwulstbildungen der Prostata und nicht zuletzt auf dem Gebiet der operativen Urologie. Er erkannte früh die für die Patienten grossen Gefahren der iatrogenen Harninfektion und verlangte deshalb strengste Indikationsstellung für alle urologischen instrumentellen Eingriffe und die genaue Einhaltung der Regeln der Asepsis. Er entwickelte zahlreiche Instrumente, begründete mit W. HEYNEMANN zusammen die Urotechnik und stellte als einer der ersten Leitlinien für die Führung urologischer Kliniken auf, die auch heute noch ihre Gültigkeit haben. MAY, der grosse Kliniker, erkannte auch schon früh die grosse Bedeutung naturwissenschaftlicher Disziplinen, insbesondere der Biochemie, für die urologische Grundlagenforschung, und er schuf gegen nicht unerhebliche Widerstände an seinem Krankenhaus entsprechende Forschungsmöglichkeiten, die er uns Jüngeren überliess.

Die Unbestechlichkeit seines Wesens zwang ihn überall und immer für die Unabhängigkeit seines Faches zu kämpfen, und es gelang ihm, durch die Schaffung des ersten Lehrstuhls für Urologie in der Bundesrepublik Deutschland nach dem Kriege die Urologie in den akademischen Bereich einzuführen. Seine akademische Lehrtätigkeit, der er mit grossem Ernst und tiefem Verantwortungsbewusstsein nachkam, erfüllte ihn mit grosser Freude und Befriedigung.

FERDINAND MAY war das grosse Glück beschieden, am 12. Januar 1898 in München als viertes Kind in die Geborgenheit einer Münchner Arztfamilie hineingeboren worden zu sein. Die Atmosphäre seines Elternhauses war geprägt durch den künstlerischen Feinsinn seiner Mutter, DOROTHEA KAULBACH, einer Enkelin des grossen Malers, und durch das Wirken seines Vaters, des Kgl. Hofrates und Geheimen Sanitätsrates Dr. FERDINAND MAY, des Schöpfers der ersten Fürsorgestellen für Lungenkranke in Bayern und Begründers zahlreicher Tuberkulose-Sanatorien, der wohl in seinem Sohn die ersten Interessen für die Medizin geweckt haben mag. Das Medizinstudium absolvierte FERDINAND MAY in München und Freiburg. Seine chirurgische Ausbildung erhielt er bei R. DAX, dessen langjähriger Oberarzt er wurde. Das Interesse für die Urologie veranlasste FERDINAND MAY schon

damals, am Schwabinger Krankenhaus in München die ersten Voraussetzungen für urologische Untersuchungen zu schaffen. Nachdem sich FERDINAND MAY entschlossen hatte, sich ganz der Urologie zuzuwenden, führte ihn sein Weg zu A. VON LICHTENBERG nach Berlin, der für sein weiteres Wirken bestimmend wurde. Nachdem FERDINAND MAY, der sich nunmehr als Urologe verstand, es zweimal abgelehnt hatte, chirurgische Chefarztstellen, und zwar als Nachfolger von R. GRASMANN bzw. E. LEXER zu übernehmen, begründete er 1939 das Urologische Krankenhaus der Landeshauptstadt München, eines der grössten und vor allem modernsten seiner Zeit. Auch der ehrenvollen Aufforderung, die Nachfolge VON HECKENBACHS am St. Hedwigskrankenhaus zu Berlin, also der früheren Wirkungsstätte seines verehrten Lehrers VON LICHTENBERG anzutreten, versagte er seine Zustimmung. Nach dem Kriege zählte FERDINAND MAY zu den Mitbegründern der wiedererstandenen Deutschen Gesellschaft für Urologie. 1949 stand er dem Deutschen Urologenkongress in München vor. 1958 setzte er, wie schon erwähnt, an der Universität München die Gründung eines urologischen Ordinariates durch. Auf dem Höhepunkt seines Schaffens und der Geltung in aller Welt schied MAY 1963 aus dem aktiven Dienst der Universität München und der Landeshauptstadt München aus. Die Präsidentschaft des XIV. Internationalen Kongresses für Urologie 1967 in München bedeutete für MAY nicht nur einen Abschluss und einen Höhepunkt seiner beruflichen Tätigkeit, sondern auch eine Ehrung ganz besonderer Art.

Stellvertretend für seine Schüler und viele Urologen in aller Welt möchte ich abschliessend FERDINAND MAY unseres Dankes – nicht nur des Geistes, sondern auch des Herzens – für sein Bemühen um uns und sein Lebenswerk versichern. Mag es ihn freuen zu wissen, dass es seine «goldenen Regeln» sind, die uns Jüngere in die Lage versetzen, die Last der eigenen Aufgabe und Verantwortung zu erfüllen, womit er uns weiterhin Vorbild bleibt. Ad multos annos!

E. MATOUSCHEK, Karlsruhe
